# Supplementary material
Source: PubMed Central journal article supplement (PMC5856724)
Supplement: 12264_2018_207_MOESM1_ESM.pdf [file 12264_2018_207_MOESM1_ESM.pdf]

**Electronic Supplementary Materials**

**Myt1L Promotes Differentiation of Oligodendrocyte Precursor Cells  
and is Necessary for Remyelination after Lysolecithin-Induced  
Demyelination**

Yanqing Shi, Qi Shao, Zhenghao Li, Ginez A Gonzalez, Fengfeng Lu, Dan Wang,

Yingyan Pu, Aijun Huang, Chao Zhao, Cheng He, Li Cao

**Table S1. Primers for Olig1, PLP and MBP used in ChIP assay**

|    | Olig1                                   | PLP                                        | MBP                                         |
|----|-----------------------------------------|--------------------------------------------|---------------------------------------------|
| 1F | TGCTGCTACCCTATCGG<br>ACA                | GAAGTGCATGAAGCACA                          | ACATTACTGCACTGTG<br>ACATCC                  |
| 1R | TAGTGAAAGCTAGCGTC<br>CCT (43-172 bp)    | CTGGGCTTCTGCAATTC<br>CT (183-326 bp)       | AGCCATAGACTGGAC<br>TCACGAA (228-329 bp)     |
| 2F | GAAGAGACAACCTGTAA<br>CCCCAA             | TACTAGAACTGCATGAA<br>GCACACC               | TACTACCCATGAGCCC<br>GCCAT                   |
| 2R | TACAAAACCTCCCAGCA<br>GTCTCG(319-468 bp) | ACAGCCTTCATAGTTGC<br>AGTC (178-284 bp)     | AGCCATAGTGATGAA<br>CAAGACCT (485-706<br>bp) |
| 3F | CATTTTGTTCTCCGAGA<br>CTGC               | TGTAAATAGTCCCAGAG<br>ATGCTCC               | CCCAGTAGAATGTA<br>AGTTTCGT                  |
| 3R | TGTCTTATGTTTCCCGA<br>GCTCA (433-566 bp) | GGAATCAAGCAGCCAAT<br>AGCC (821-932 bp)     | CTCTATCTACCCACTG<br>TCGGTT (647-767 bp)     |
| 4F | TCGGGAAACATAAGACA<br>TCACT              | AGCTGCACTTTCGTAAC<br>AGG                   | CGGACAAAATATTATA<br>GGAAAGTGTGA             |
| 4R | AACCACTCAGTTCTAGC<br>CT (549-634 bp)    | TATACCAGACTAAGGCC<br>ATGACT (1018-1120 bp) | AGCACATGGAAAATG<br>CAAT (1048-1207 bp)      |
| 5F | CTGCTGCTTATATGAGAT<br>TCCC              | AGACTTAGCTGCTTGTT<br>TTATCGT               | ATTGCATTTTCCATGT<br>GCTCGGTA                |

## Neuroscience Bulletin

|    |                                           |                                             |                                                |
|----|-------------------------------------------|---------------------------------------------|------------------------------------------------|
| 5R | TCTTCCCAGATATGTCC<br>GTTT (911-1025 bp)   | TCTTGCCCTGGAAACAC<br>AATAGGGA (1407-1511bp) | TGAGCATTCTCTCTC<br>CCGGAT (1188-1342 bp)       |
| 6F | TGCTGCTTATATGAGATT<br>CCC                 |                                             | AATGCCCTGAATAAG<br>CAGTTCCC                    |
| 6R | TTCTCTGCCTTGGTAAC<br>CT (912-987 bp)      |                                             | ACAAGCCCCAGATGT<br>GAAGCC (1276-1454<br>bp)    |
| 7F | CTTCCTCCCCTAGTTACT<br>AAGACA              |                                             | GGCTCTCAGGTCATC<br>GCTCT                       |
| 7R | TTCACAGAATTTTGCAA<br>CGGAT (1327-1469 bp) |                                             | TCAACCAAAGGGAGC<br>TAACCCGTA<br>(1558-1668 bp) |
| 8F | GCTGGATCACATTTTAC<br>ATGGAC               |                                             | AGCCACGTATACCAA<br>GCAAGCTC                    |
| 8R | CAACACGGTTCCTTCGA<br>G (1632-1759 bp)     |                                             | AGCCTCGTAGCACTTT<br>GAATAGCC (1619-1692<br>bp) |

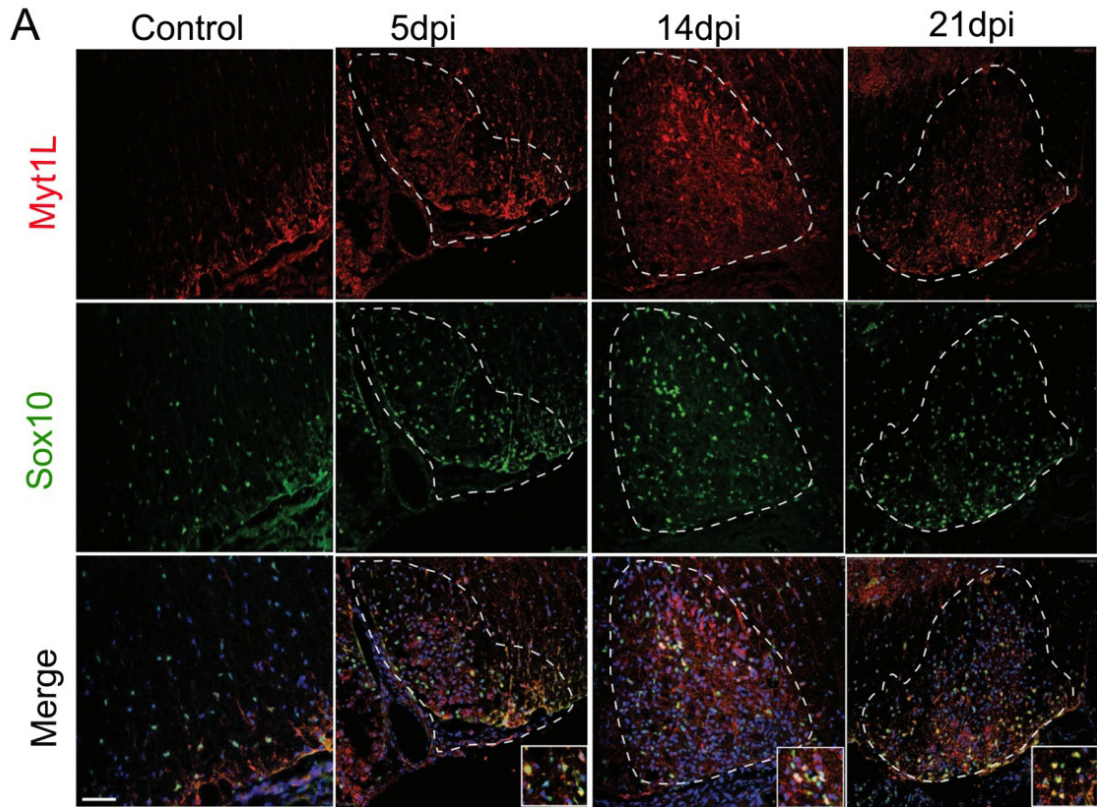

Fig. S1. (A) Representative images demonstrating expression of Myt1l (red) by Sox10<sup>+</sup> oligodendrocyte lineage cells (green) in normal white matter (Control) and at 5, 14, and 21 dpi. Dashed lines delimitate the lesion area. Scale bar, 75  $\mu$ m. Images captured by confocal microscopy (Sp5 Leica, Wetzlar, Germany).

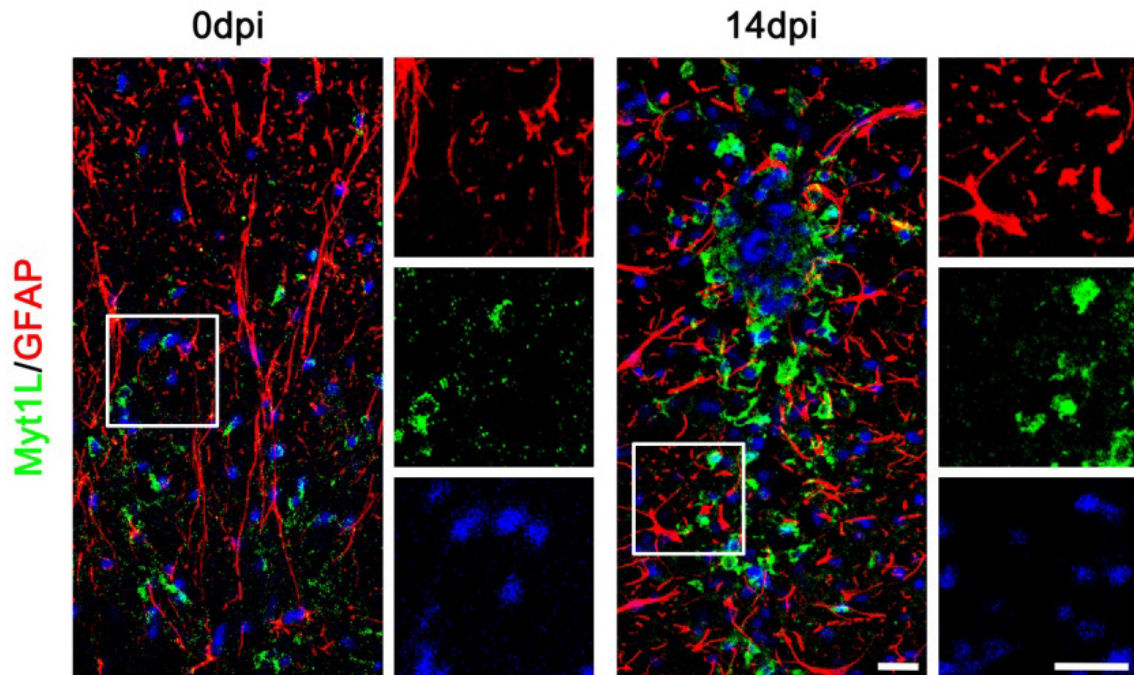

Fig. S2. Expression of Myt1L (green) in GFAP<sup>+</sup> astrocytes (red) in the dorsal spinal cord of mice at 0 and 14 dpi detected by immunofluorescence staining. Scale bars, 20 μm.

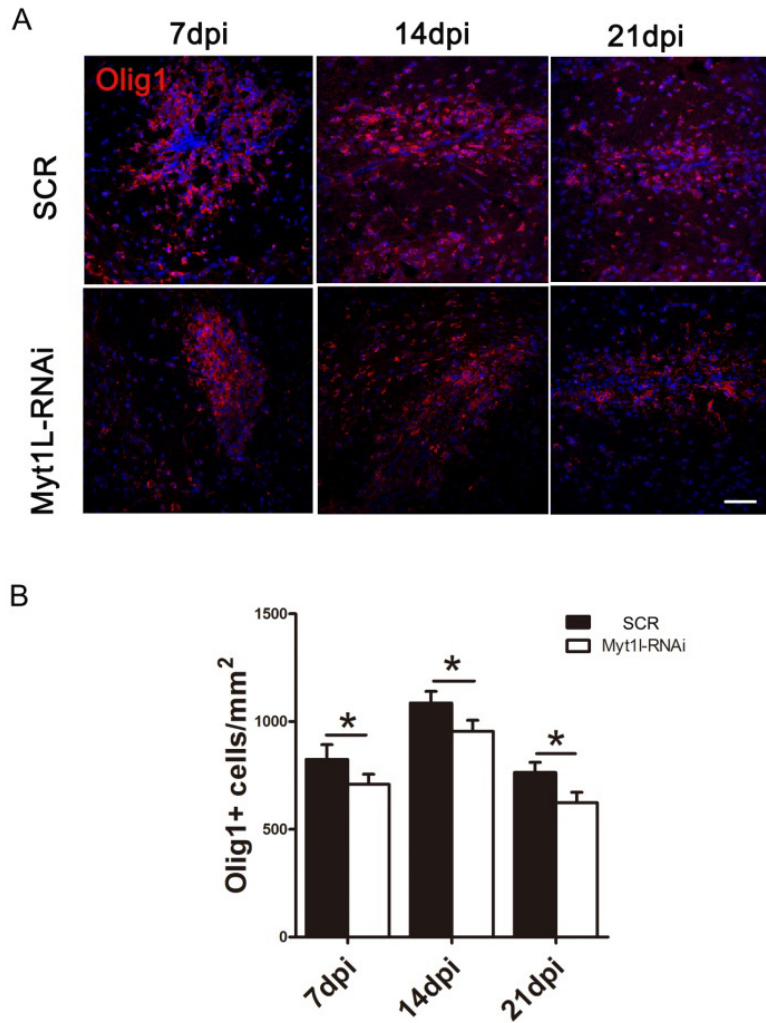

Fig. S3. (A) Representative immunohistofluorescence staining showing Olig1 (red) expression at various time points in different groups in the demyelinating area of the spinal cord. (B) Quantification of Olig1<sup>+</sup> cells in the demyelinating area as in A. \* $P < 0.05$ , one-way ANOVA with Tukey's *post hoc* test;  $n = 5$ /group; scale bar, 20  $\mu\text{m}$ .

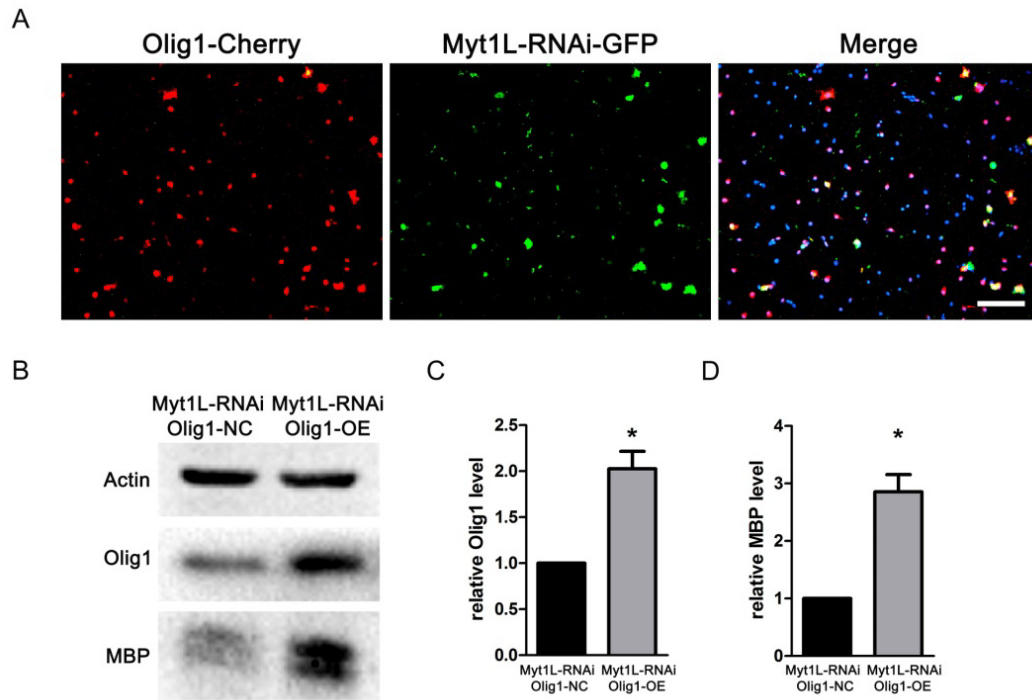

Fig. S4. (A) Representative images showing the infection efficiency of Olig1-OE (cherry) and Myt1L-RNAi (GFP) virus-transfection in OPCs. (B–D) Western blots and analysis of Olig1 and MBP protein levels. \* $P < 0.05$ , Student's  $t$ -test; scale bar, 100  $\mu\text{m}$ .
